# Supplementary material for: Treatment and Outcomes of Metastatic Non-Small-Cell Lung Cancer Harboring Uncommon EGFR Mutations: Are They Different from Those with Common EGFR Mutations?
Source: MDPI journal article supplement (doi:10.3390/biology9100326), 2020-10-07

## Supplementary Table 1

Comparison of the baseline characteristics between common and uncommon EGFR mutation

NSCLC

| Patient Characteristics                      |                                                      | Total N               | Common mutation       | Uncommon mutation | P-value |
|----------------------------------------------|------------------------------------------------------|-----------------------|-----------------------|-------------------|---------|
| Total                                        |                                                      | 2,121                 | 1,986                 | 135               |         |
| Age                                          |                                                      |                       |                       |                   | 0.06    |
|                                              | <60 years                                            | 906 (42.7%)           | 859 (43.3%)           | 47 (34.8%)        |         |
|                                              | ≥60 years                                            | 1215 (57.3%)          | 1127 (56.7%)          | 88 (65.2%)        |         |
| Sex                                          |                                                      |                       |                       |                   | 0.02    |
|                                              | Male                                                 | 780 (36.8%)           | 716 (36.1%)           | 64 (47.4%)        |         |
|                                              | Female                                               | 1341 (63.2%)          | 1270 (63.9%)          | 71 (52.6%)        |         |
| ECOG PS                                      |                                                      |                       |                       |                   | 0.247   |
|                                              | 0                                                    | 442 (20.9%)           | 414 (20.8%)           | 28 (20.7%)        |         |
|                                              | 1                                                    | 1573 (74.2%)          | 1477 (74.4%)          | 96 (71.1%)        |         |
|                                              | 2                                                    | 106 (5.0%)            | 95 (4.8%)             | 11 (8.1%)         |         |
| Smoking status                               |                                                      |                       |                       |                   | 0.003   |
|                                              | Never smoker                                         | 1484 (70.0%)          | 1409 (70.9%)          | 75 (55.2%)        |         |
|                                              | Ex-smoker                                            | 432 (20.4 %)          | 387 (19.5%)           | 45 (33.3%)        |         |
|                                              | Current smoker                                       | 205 (9.7%)            | 190 (9.6%)            | 15 (11.1%)        |         |
| History of curative thoracic surgery         |                                                      |                       |                       |                   | 0.55    |
|                                              | Yes                                                  | 685 (32.3%)           | 659 (33.2%)           | 26 (19.2%)        |         |
|                                              | No                                                   | 1436 (67.7%)          | 1327 (66.8%)          | 109 (80.7%)       |         |
| EGFR-TKI                                     |                                                      |                       |                       |                   | 0.043   |
|                                              | Gefitinib                                            | 1046 (49.3%)          | 999 (50.0%)           | 47 (38.5%)        |         |
|                                              | Erlotinib                                            | 305 (14.4%)           | 284 (14.2%)           | 21 (17.2%)        |         |
|                                              | Afatinib                                             | 770 (36.3%)           | 716 (35.8%)           | 54 (44.3%)        |         |
| Patients who experienced disease progression |                                                      | 1316 (62.0%)          | 1,238 (61.9%)         | 78 (63.9%)        | 0.70    |
| Sequential treatment                         |                                                      |                       |                       |                   |         |
|                                              | Rate of re-biopsy after failing first-line EGFR-TKIs | 859 (65.3%, 859/1316) | 824 (66.6%, 824/1238) | 35 (44.9%, 35/78) | <0.001  |
|                                              | Detection rate of T790M                              | 533 (62.0%, 533/859)  | 523 (63.5%, 523/824)  | 10 (28.6%, 10/35) | <0.001  |
| Sequential treatment                         |                                                      |                       |                       |                   | <0.001  |
|                                              | Third-generation EGFR-TKIs                           | 599(45.5%)            | 582 (47.0%)           | 17 (21.8%)        |         |
|                                              | Cytotoxic chemotherapy                               | 488 (37.1%)           | 447 (36.1%)           | 41 (52.6%)        |         |
|                                              | No sequential treatment                              | 229 (17.4%)           | 209 (16.9%)           | 20 (25.6%)        |         |

**Supplementary Fig. 1.** (A) Median progression-free survival (PFS) according to the type of epidermal growth factor receptor (*EGFR*) mutation (common versus uncommon). (B) Median overall survival (OS) according to the type of EGFR mutation (common versus uncommon)

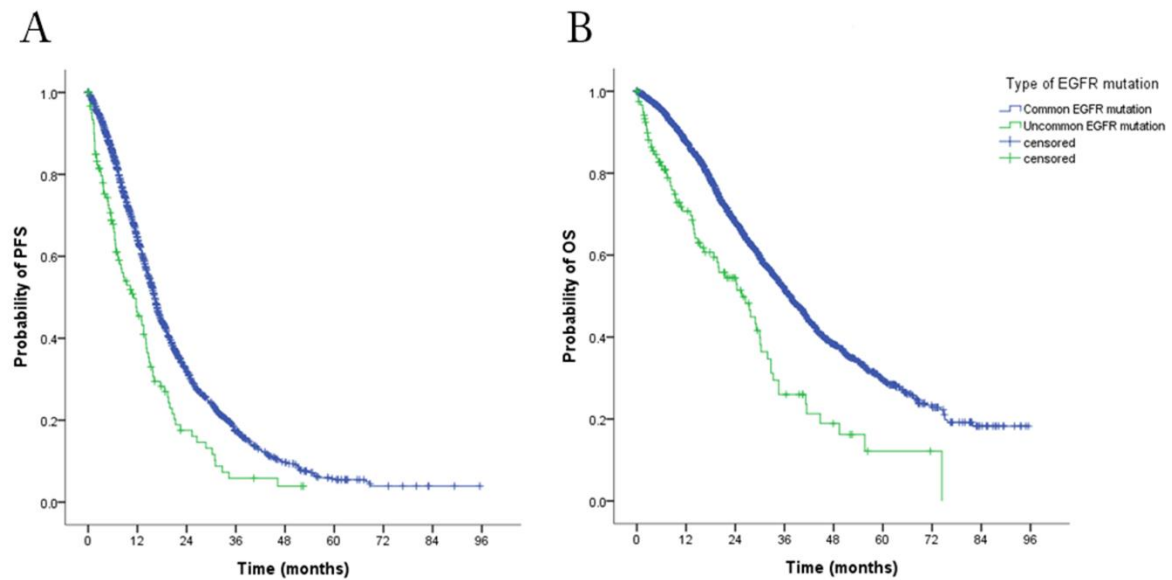

Supplement: s1 [file s1]
